# Supplementary material
Source: publisher figshare collection journal article supplement (https://acs.figshare.com/ndownloader/files/31130180)
Supplement: Supplementary file 1 [file 31130180]

Supporting Information for

**A rotary valve-assisted fluidic system coupling with CRISPR/Cas12a for fully integrated nucleic acids detection**

Hui Wu<sup>1</sup>, Siwenjie Qian<sup>1</sup>, Cheng Peng<sup>2</sup>, Xiaofu Wang<sup>2</sup>, Tingzhang Wang<sup>3</sup>, Xiaoping Zhong<sup>3</sup>, Yanju Chen<sup>1</sup>, Qunqing Yang<sup>4</sup>, Junfeng Xu<sup>2\*</sup> and Jian Wu<sup>1,5\*</sup>

<sup>1</sup> College of Biosystems Engineering and Food Science, Zhejiang University, Hangzhou, 310058, China

<sup>2</sup> State Key Laboratory for Managing Biotic and Chemical Threats to the Quality and Safety of Agro-products, Zhejiang Academy of Agricultural Sciences, Hangzhou 310021, China

<sup>3</sup> Key Laboratory of Microbiol Technology and Bioinformatics of Zhejiang Province, Zhejiang Institute of Microbiology, Hangzhou, 310012, China

<sup>4</sup> Department of Security and Precaution, Zhejiang Police Vocational Academy, High-Education Park of Xiasha, Hangzhou, 310018, China

<sup>5</sup> Key Laboratory of on Site Processing Equipment for Agricultural Products, Ministry of Agricultural and Rural Affairs, Hangzhou, 310058, China

\* Correspondence

(J. Xu) E-mail: [njfjxu@163.com](mailto:njjfxu@163.com)

23 State Key Laboratory for Managing Biotic and Chemical Threats to the Quality and  
24 Safety of Agro-products, Zhejiang Academy of Agricultural Sciences, Hangzhou  
25 310021, China  
26 (J. Wu) E-mail: [wujian69@zju.edu.cn](mailto:wujian69@zju.edu.cn). Tel: 0086-571-88982180  
27 Fax: 0086-571-88982180 College of Biosystems Engineering and Food Science,  
28 Zhejiang University, Hangzhou, 310058, China.

### ***Real-time PCR assay for *V. parahaemolyticus****

The real-time PCR assay was carried out in 25  $\mu$ L reaction mixtures. The mixtures contained 1  $\times$  Ex Taq Buffer for Taq DNA polymerase (Takara Biomedical Technology Co., Ltd., Beijing, China), 0.2 mM dNTP each (Sangon, Shanghai, China), 0.4  $\mu$ M F-tlh, 0.4  $\mu$ M R-tlh, 0.625 U Ex Taq DNA polymerase (Takara Biomedical Technology Co., Ltd., Beijing, China), 4  $\mu$ M SYTO 9 fluorescent stains (Thermo Fisher Scientific, Inc., Waltham, MA, USA) and 4  $\mu$ L templates. And 20  $\mu$ L mineral oil was added over the reaction mixtures to avoid evaporation. The thermal-cycled program was 95  $^{\circ}$ C for 5 min, 40 cycles of 95  $^{\circ}$ C for 15 s and 60  $^{\circ}$ C for 30 s. The amplification reaction was performed in a QuantStudio 3 Real-time PCR system (Thermo Fisher Scientific Inc., Waltham, MA, USA). The cycle threshold ( $C_t$ ) value reflected the initial number of the cycles at which a detectable fluorescent signal was generated. The amplicons could be further analyzed by melting curve. The melting process was performed at an ascent rate of 0.15  $^{\circ}$ C/s from 70  $^{\circ}$ C to 95  $^{\circ}$ C and the fluorescent signal was recorded every 2 s. The primers were synthesized by Sangon (Shanghai, China) and the detailed information about the primers can be seen in **Table S2**.

47     ***The magnetic bead-based laboratory method***

48         Detailed operation process was as follows: 300 µL of cultured bacterial strains were  
49     first centrifuged at 10000 rpm for 2 min in 1.5 mL centrifuge tube and the supernatant  
50     was discarded. The precipitated bacterial strains were resuspended by 250 µL of lysis  
51     reagents. The lysis reagents (pH 7.6-8.0) were consisted of 4 M guanidinium  
52     isothiocyanate (GITC), 20 mM ethylenediaminetetraacetic acid (EDTA), 2 % sarkosyl  
53     and 50 mM Tris-HCl. Then, 300 µL of isopropanol and 2 µL of magnetic beads (Sera-  
54     Mag SpeedBeads Carboxyl Magnetic Beads, 50 mg/mL) were added into the tube. The  
55     tube was shaken at room temperature for 15 min. A magnetic stand was used to settle  
56     the magnetic beads and the supernatant was discarded. Afterwards, the magnetic beads  
57     were washed twice with 300 µL of 80 % ethanol. Later, the supernatant was completely  
58     removed, and the magnetic beads needed to be dried for about 10 min to ensure that the  
59     remaining ethanol could be removed thoroughly. Finally, 50 µL of nuclease-free water  
60     was added into the tube to resuspend the magnetic beads for 5 min. The magnetic beads  
61     were settled by the magnetic stand and the supernatant containing nucleic acids was  
62     collected for subsequent experiments.

63

64     ***The agarose gel electrophoresis analysis***

65             After amplification, the amplicons were electrophoresed at 110 V on a 3 % (w/v)  
66     agarose gel (pre-supplemented with GoldView II, Solarbio Science & Technology Co.,  
67     Ltd, Beijing, China) in 1 × TAE buffer. A 50 bp DNA ladder (Sangon, Shanghai, China)  
68     was employed as marker. The gel was photographed with a ChemiDoc XRS+ System  
69     (BioRad, CA, USA).

70

### *The detailed lyophilization steps for LAMP reagents*

The one lyophilized protection solution (Solution 1), which consisted of 30 % (wt) D-(+)-trehalose dihydrate ( $C_{12}H_{22}O_{11} \cdot 2H_2O$ ) and 10 % (wt) pullulan ( $((C_{37}H_{62}O_{30})_n)$ , was first prepared. During preparation, after the pullulan was fully dissolved, the D-(+)-trehalose dihydrate was then added. All of them were purchased from Macklin Biochemical Co., Ltd, Shanghai, China. Subsequently, another lyophilized protection solution consisting of 60 % (wt) Mannitol ( $C_6H_{14}O_6$ ) was prepared (Solution 2). Mannitol was purchased from Shanghai yuanye Bio-Technology Co., Ltd, China. Afterwards, the LAMP mixtures (total 12  $\mu$ L) was prepared (Solution 3), which contained 5  $\mu$ L of  $10 \times$  ThermoPol buffer, 32 U *Bst* DNA polymerase, 8 mM  $MgSO_4$ , 6 mM dNTP, 3.2 M betaine and primer mixtures consisting of 6.4  $\mu$ M FIP-tlh, 6.4  $\mu$ M BIP-tlh, 0.8  $\mu$ M F3-tlh, 0.8  $\mu$ M B3-tlh, 1.6  $\mu$ M LF-tlh and 1.6  $\mu$ M LB-tlh.

Then, the 20  $\mu$ L of solution 1, 5  $\mu$ L of solution 2 and 12  $\mu$ L of solution 3 were mixed. The mixtures stood at 4 °C for 2 hours to make the protection solution and LAMP mixtures mixed thoroughly. After mixing, the solution mixtures were stored at -20 °C for 6 h and then were stored at -80 °C for 36-48 h. Finally, the mixtures were freeze-dried for 4-5 h by the freeze dryer (SCIENTZ-10N, Ningbo Scientz Biotechnology Co., Ltd, China). Thus, the lyophilized LAMP reagents were obtained.

90    ***The preparation procedure of spiked shrimp samples***

91       Fresh shrimp samples purchased from Hangzhou local market were first de-headed  
92    and de-contaminated by immersing in 75 % ethanol for 2 min. Then, the shrimp samples  
93    were washed by nuclease-free water and placed in a biological safety hood under UV  
94    light for 30 min. Afterwards, the sterile shrimp samples were respectively incubated  
95    with a series of gradient concentrations of *V. parahaemolyticus* (O3:K6 and O4:K8) for  
96    30 min under ambient temperature, which made the shrimp samples fully attached by  
97    *V. parahaemolyticus*. Thus, the preparation of spiked shrimp samples was completed,  
98    and disposable Q-tips were used to collect the samples by fully wiping the shrimps.  
99

100 **Table S1.** The information about the bacterial strains used in this study.

| Strain                          | Strain ID or serotypes | PCR for tlh | Source <sup>a</sup> |
|---------------------------------|------------------------|-------------|---------------------|
| <i>Vibrio parahaemolyticus</i>  | O3:K6                  | P           | Lin'an CDC (China)  |
| <i>Vibrio parahaemolyticus</i>  | O4:K8                  | P           | Lin'an CDC (China)  |
| <i>Vibrio parahaemolyticus</i>  | ATCC33846              | P           | ATCC                |
| <i>Vibrio parahaemolyticus</i>  | ATCC33847              | P           | ATCC                |
| <i>Vibrio parahaemolyticus</i>  | ATCC17802              | P           | ATCC                |
| <i>Vibrio harveyi</i>           | ATCC14126              | N           | ATCC                |
| <i>Vibrio vulnificus</i>        | ATCC27562              | N           | ATCC                |
| <i>Vibrio cholerae</i>          | ATCC14035              | N           | ATCC                |
| <i>Vibrio cincinnatiensis</i>   | ATCC35912              | N           | ATCC                |
| <i>Vibrio mimicus</i>           | ATCC33653              | N           | ATCC                |
| <i>Vibrio natriegens</i>        | ATCC14048              | N           | ATCC                |
| <i>Vibrio fluvialis</i>         | ATCC33809              | N           | ATCC                |
| <i>Vibrio vulnificus</i>        | ATCC29306              | N           | ATCC                |
| <i>E. coli</i> O157:H7          | ATCC43889              | N           | ATCC                |
| <i>Staphylococcus aureus</i>    | ATCC29213              | N           | ATCC                |
| <i>Aspergillus brasiliensis</i> | ATCC16404              | N           | ATCC                |
| <i>Pseudomonas aeruginosa</i>   | ATCC9027               | N           | ATCC                |
| <i>Listeria monocytogenes</i>   | ATCC54006              | N           | ATCC                |
| <i>Candida albicans</i>         | ATCC10231              | N           | ATCC                |
| <i>Escherichia coli</i>         | ATCC25922              | N           | ATCC                |
| <i>Bacillus subtilis</i>        | ATCC6633               | N           | ATCC                |
| <i>Escherichia coli</i>         | ATCC8739               | N           | ATCC                |

101 P/N: Positive/Negative results

102 <sup>a</sup> Lin'an CDC: Lin'an Center for Disease Control and Prevention; ATCC: American Type Culture  
 103 Collection.

104



**Table S2.** Sequences of primers and gRNA-tlh

| Category                   | Sequence name | Sequence information                           | Reference |
|----------------------------|---------------|------------------------------------------------|-----------|
| Primers used in LAMP assay | F3-tlh        | CGCTGACAATCGCTTCTCAT                           | 1         |
|                            | B3-tlh        | GTTCTTCGCTTTGGCAATGT                           |           |
|                            | FIP-tlh       | CTGTCACCGAGTGCAACCACTTAACC<br>ACACGATCTGGAGCA  |           |
|                            | BIP-tlh       | GCATCACAATGGCGCTTCCCACCGTT<br>GGAGAAGTGACCTA   |           |
|                            | LF-tlh        | TGTTGATTTGATCTGGCTGC                           |           |
|                            | LB-tlh        | TAACCCGAACAGCTGGTTC                            |           |
| Primers used in PCR assay  | F-tlh         | GACATTACGTTCTTCGCCGC                           | 2         |
|                            | R-tlh         | GTTCTTCGCCAGTTTTGCGT                           |           |
| gRNA used in CRISPR/Cas12a | gRNA-tlh      | UAAUUUCUACUAAGUGUAGAUUUG<br>AUUUGAUCUGGCUGCAUU |           |

107 **Table S3** Comparison of our established method, other reported methods by LAMP  
108 and commercial methods for pathogen detection

| Targets                         | Fully integrated     | D-time   | D-cost       | Sensitivity (per reaction) | Operation process             | Ref.      |
|---------------------------------|----------------------|----------|--------------|----------------------------|-------------------------------|-----------|
| <i>Vibrio parahaemolyticus</i>  | Yes                  | 80 min   | < \$4 (USD)  | 31 copies                  | No centrifugation; No pumping | This work |
| <b>Other reported methods</b>   |                      |          |              |                            |                               |           |
| <i>Vibrio parahaemolyticus</i>  | No                   | 60 min   | < \$4 (USD)  | 2.63 CFU                   | Complicated manual operation  | 1         |
| <i>Vibrio parahaemolyticus</i>  | No                   | > 80 min | < \$4 (USD)  | ~ 2000 copies              | Complicated manual operation  | 3         |
| <i>Vibrio parahaemolyticus</i>  | No                   | < 60 min | > \$5 (USD)  | 100 copies                 | Centrifugation                | 4         |
| <i>Vibrio parahaemolyticus</i>  | No                   | > 70 min | < \$4 (USD)  | 41.8 copies                | Complicated manual operation  | 5         |
| <i>Salmonella</i>               | Yes                  | > 70 min | > \$15 (USD) | ~ 50 CFU                   | Pumping                       | 6         |
| <i>Salmonella</i>               | Yes                  | 90 min   | > \$10 (USD) | 0.34 CFU                   | Pumping                       | 7         |
| <i>Vibrio parahaemolyticus</i>  | Yes                  | 60 min   | > \$10 (USD) | 100 CFU                    | Centrifugation                | 8         |
| <i>Escherichia coli</i> O157:H7 | No                   | > 60 min | 120 (USD)    | 2 copies                   | Complicated manual operation  | 9         |
| <b>Commercial methods</b>       |                      |          |              |                            |                               |           |
| <i>Adenovirus</i>               | Yes; FilmArray pouch | ~ 60 min | > \$80 (USD) | 60 CFU                     | /                             | 10        |
| <i>Ebola virus</i>              | Yes; GeneXpert       | 100 min  | > \$30 (USD) | 7.3 copies                 | /                             | 11        |
| <i>Influenza virus</i>          | Yes; Cobas Liat      | ~ 20 min | > \$20 (USD) | ~ 250 copies               | /                             | 12        |

109 D-time: detection time from sampling to results; D-cost: detection cost per test.

110

**Figure S1** The schematic diagram of LAMP reaction coupling with CRISPR/Cas12a

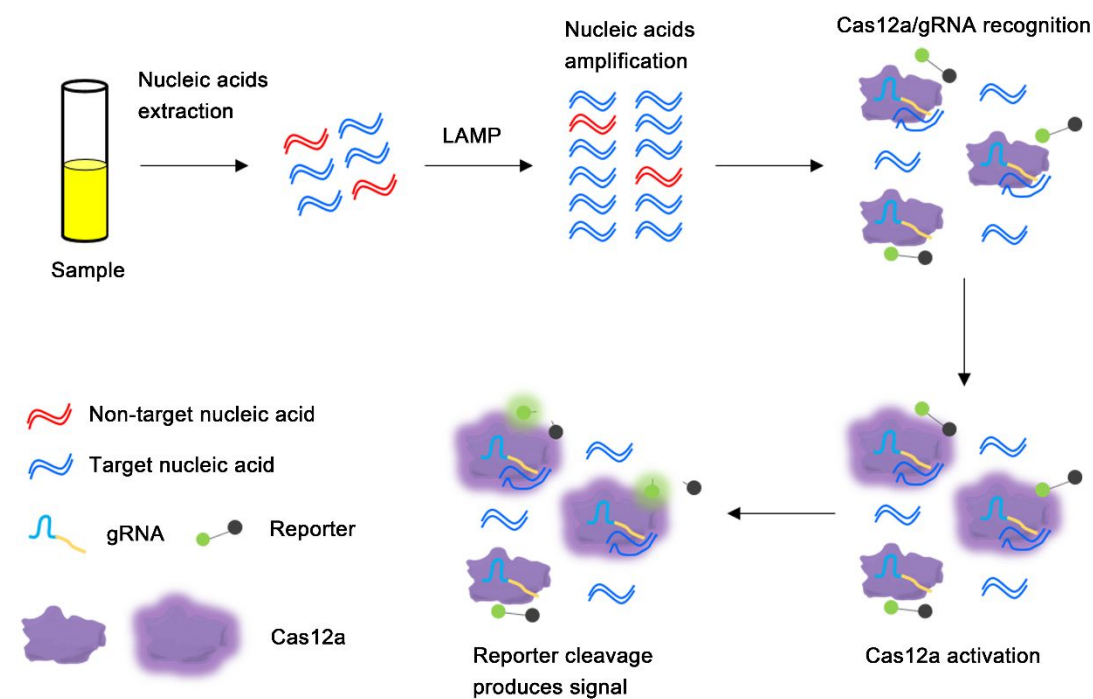

**Figure S2** The photos of fluidic chip. **a)** The appearance of fluidic chip. **b)** The top and side views of fluidic chip.

**a)**

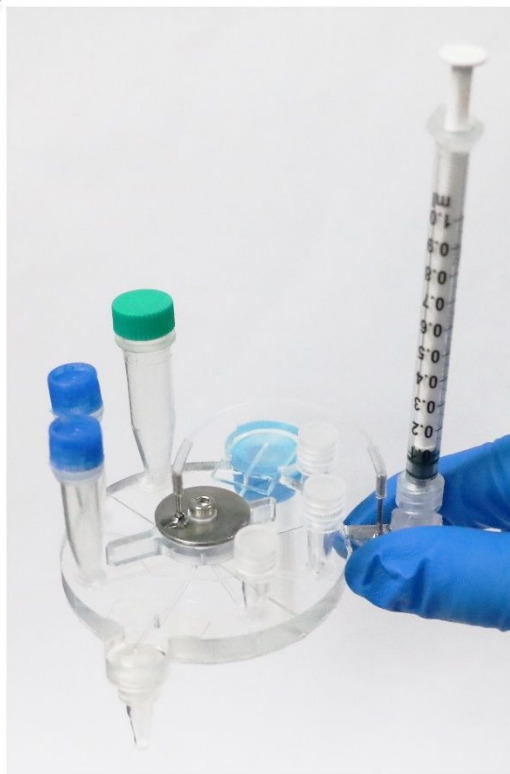

the appearance of fluidic chip

**b)**

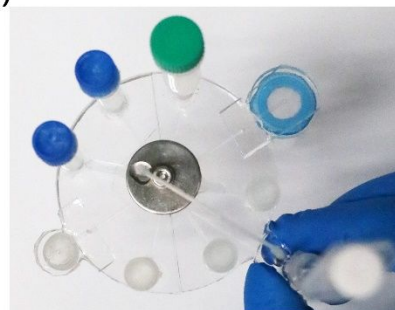

top view

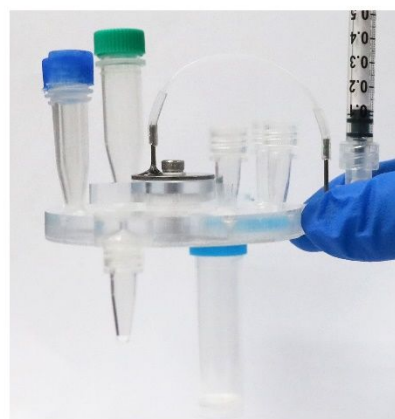

side view

**Figure S3** The nucleic acids extraction process with the fluidic chip (45 min) and the whole operation process from sampling to results completed in 80 min.

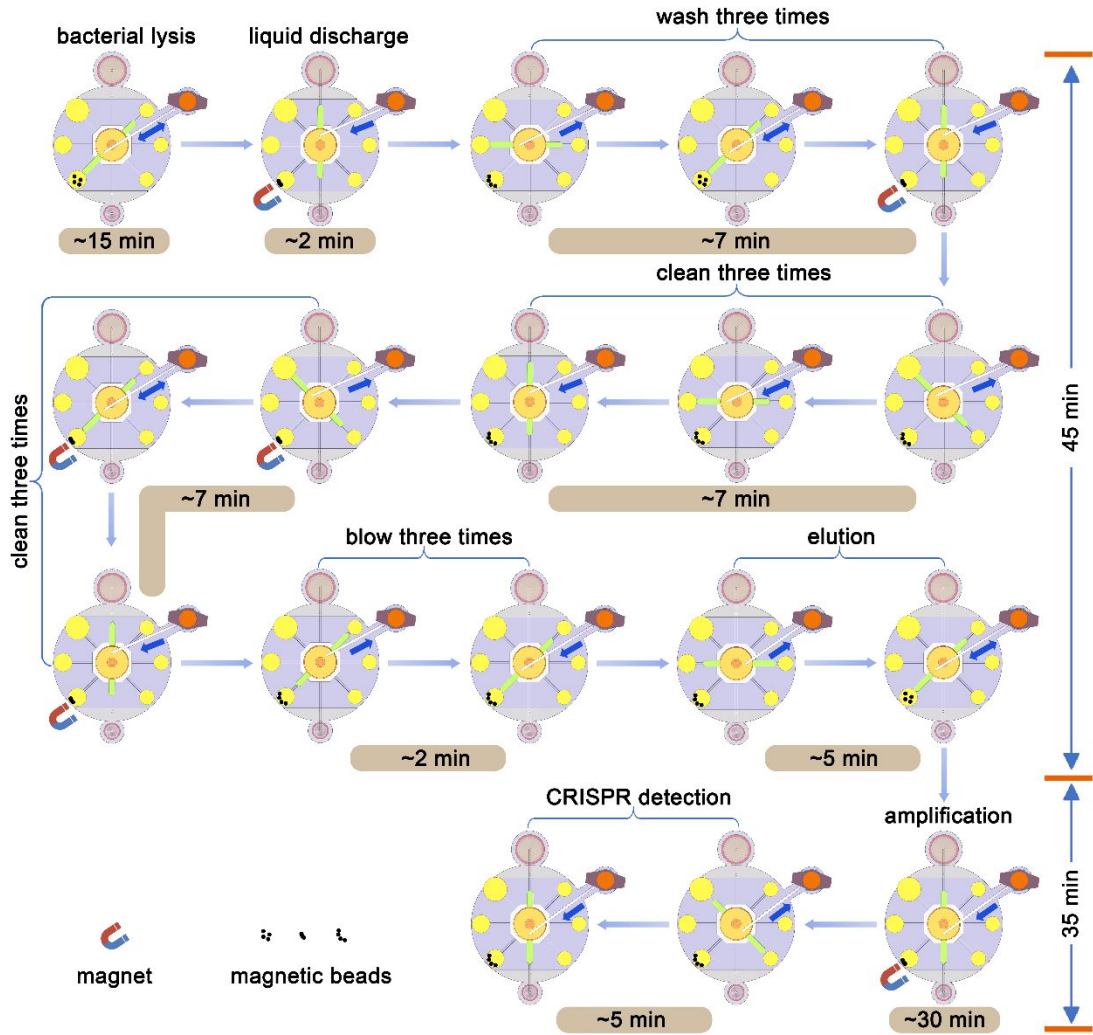

**Figure S4 a)** The gel image of LAMP amplicons with *V. parahaemolyticus* (O3:K6 and O4:K8) containing around  $3.1 \times 10^6$  copies of target DNA as targets. M: marker; N: nuclease-free water. **b)** The gel image before CRISPR/Cas12a detection (b-1) and after CRISPR/Cas12a detection (b-2). LAMP reaction was conducted with *V. parahaemolyticus* (O3:K6) containing around  $3.1 \times 10^6$  copies of target DNA as target.

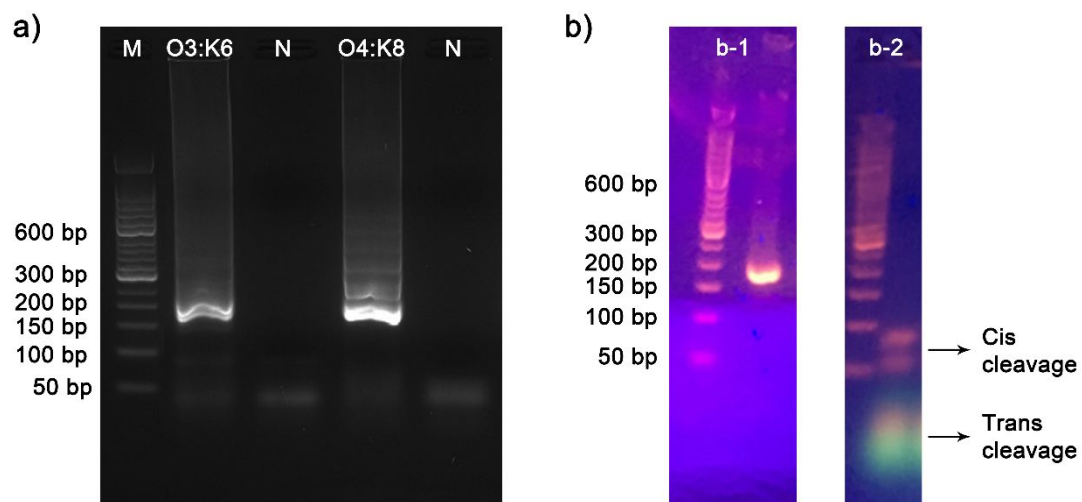

**Figure S5** Results of specificity test by the fluidic chip coupling with CRISPR/Cas12a  
 (The detection concentration of bacteria was adjusted to  $1.0 \times 10^6$  copies of target DNA  
 per reaction; The fluorescent signal intensity acquired by QuantStudio 3 Real-time PCR  
 system after the CRISPR reagents were mixed with LAMP reaction mixtures for 5 min  
 at 37 °C)

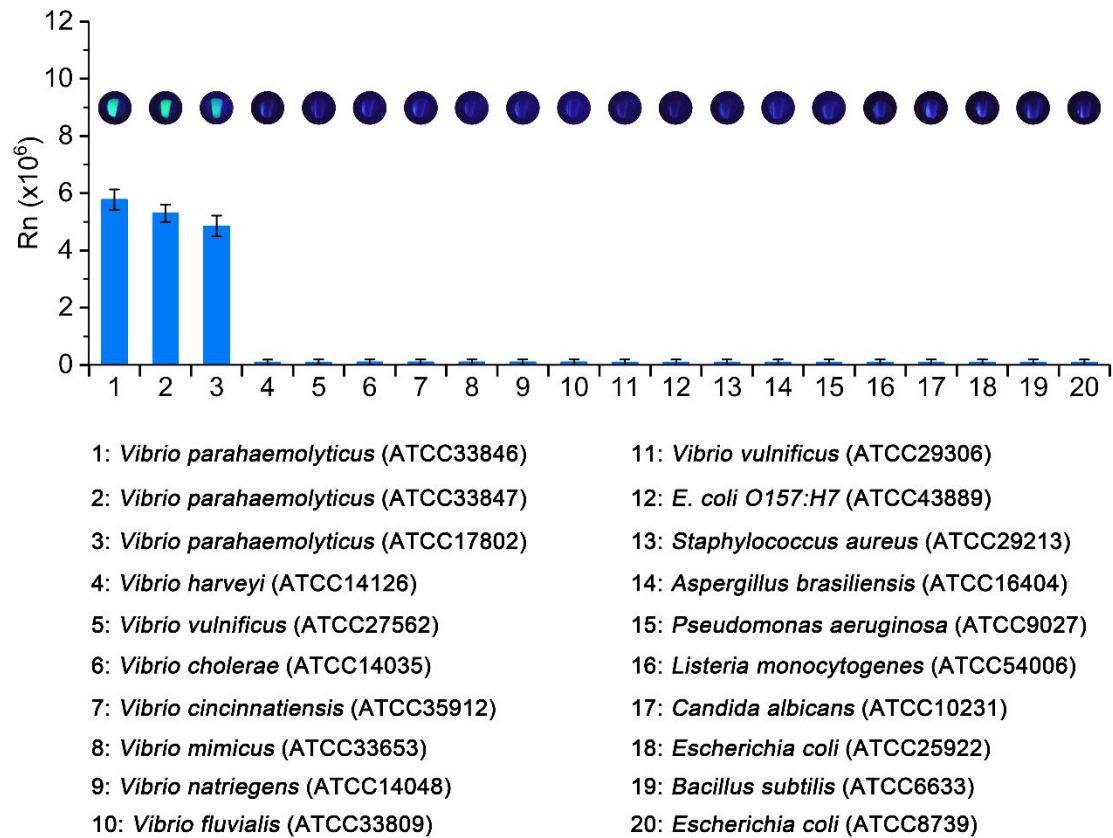

136    ***Captions for Supporting Videos S1-S2***

137    Supporting video S1. The sealing performance of fluidic chip.

138    Supporting video S2. The liquid stirring performance of fluidic chip.

139



## References

- (1) Wang, R.; Xiao, X.; Chen, Y.; Wu, J.; Qian, W.; Wang, L.; Liu, Y.; Ji, F.; Wu, J., A loop-mediated, isothermal amplification-based method for visual detection of *Vibrio parahaemolyticus* within only 1 h, from shrimp sampling to results. *Anal. Methods* **2017**, 9, 1695-1701.
- (2) Wu, H.; Chen, Y. J.; Yang, Q. Q.; Peng, C.; Wang, X. F.; Zhang, M. Y.; Qian, S. W. J.; Xu, J. F.; Wu, J., A reversible valve-assisted chip coupling with integrated sample treatment and CRISPR/Cas12a for visual detection of *Vibrio parahaemolyticus*. *Biosens. Bioelectron.* **2021**, 188, DOI: 10.1016/j.bios.2021.113352.
- (3) Liu, N.; Zou, D.; Dong, D.; Yang, Z.; Ao, D.; Liu, W.; Huang, L., Development of a multiplex loop-mediated isothermal amplification method for the simultaneous detection of *Salmonella* spp. and *Vibrio parahaemolyticus*. *Sci. Rep.* **2017**, 7, DOI: 10.1038/srep45601.
- (4) Seo, J. H.; Park, B. H.; Oh, S. J.; Choi, G.; Kim, D. H.; Lee, E. Y.; Seo, T. S., Development of a high-throughput centrifugal loop-mediated isothermal amplification microdevice for multiplex foodborne pathogenic bacteria detection. *Sens. Actuators, B* **2017**, 246, 146-153.
- (5) Pang, B.; Yao, S.; Xu, K.; Wang, J.; Song, X. L.; Mu, Y.; Zhao, C.; Li, J., A novel visual-mixed-dye for LAMP and its application in the detection of foodborne pathogens. *Anal. Biochem.* **2019**, 574, 1-6.
- (6) Tsougeni, K.; Kaprou, G.; Loukas, C. M.; Papadakis, G.; Hamiot, A.; Eck, M.; Rabus, D.; Kokkoris, G.; Chatzandroulis, S.; Papadopoulos, V.; Dupuy, B.; Jobst, G.; Gizeli, E.; Tserepi, A.; Gogolides, E., Lab-on-Chip platform and protocol for rapid foodborne pathogen detection comprising on-chip cell capture, lysis, DNA amplification and surface-acoustic-wave detection. *Sens. Actuators, B* **2020**, 320, DOI: 10.1016/j.snb.2020.128345.
- (7) Wang, S. Y.; Liu, N.; Zheng, L. Y.; Cai, G. Z.; Lin, J. H., A lab-on-chip device for the sample-in-result-out detection of viable *Salmonella* using loop-mediated isothermal amplification and real-time turbidity monitoring. *Lab Chip* **2020**, 20, 2296-2305.
- (8) Van Nguyen, H.; Nguyen, V. D.; Lee, E. Y.; Seo, T. S., Point-of-care genetic analysis for multiplex pathogenic bacteria on a fully integrated centrifugal microdevice with a large-volume sample. *Biosens. Bioelectron.* **2019**, 136, 132-139.
- (9) Nguyen, H. V.; Nguyen, V. D.; Liu, F.; Seo, T. S., An Integrated Smartphone-Based Genetic Analyzer for Qualitative and Quantitative Pathogen Detection. *Acs Omega* **2020**, 5, 22208-22214.
- (10) Poritz, M. A.; Blaschke, A. J.; Byington, C. L.; Meyers, L.; Nilsson, K.; Jones, D. E.; Thatcher, S. A.; Robbins, T.; Lingenfelter, B.; Amiot, E.; Herbener, A.; Daly, J.; Dobrowolski, S. F.; David, H. F. T.; Ririe, K. M., FilmArray, an Automated Nested Multiplex PCR System for Multi-Pathogen Detection: Development and Application to Respiratory Tract Infection. *PLoS ONE* **2011**, 6, DOI: 10.1371/journal.pone.0026047.
- (11) Pinsky, B. A.; Sahoo, M. K.; Sandlund, J.; Kleman, M.; Kulkarni, M.; Grufman, P.; Nygren, M.; Kwiatkowski, R.; Baron, E. J.; Tenover, F.; Denison, B.; Higuchi, R.; Van Atta, R.; Beer, N. R.; Carrillo, A. C.; Naraghi-Arani, P.; Mire, C. E.; Ranadheera, C.; Grolla, A.; Lagerqvist, N.; Persing, D. H., Analytical Performance Characteristics of the Cepheid GeneXpert Ebola Assay for the Detection of Ebola Virus. *PLoS ONE* **2015**, 10, DOI: 10.1371/journal.pone.0142216.
- (12) Gosert, R.; Naegel, K.; Hirsch, H. H., Comparing the Cobas Liat Influenza A/B and respiratory syncytial virus assay with multiplex nucleic acid testing. *J. Med. Virol.* **2019**, 91, 582-587.
